# Supplementary material
Source: PubMed Central journal article supplement (PMC3963455)
Supplement: cmi0015-2093-sd1.pdf [file cmi0015-2093-sd1.pdf]

## Supplementary data

**Supplementary Table S1.** Antibiotic susceptibility of *mptC* mutant

| antibiotic      | MIC (µg/ml) |                    |                               |
|-----------------|-------------|--------------------|-------------------------------|
|                 | wildtype    | <i>mptC</i> mutant | <i>mptC</i> + Mm- <i>mptC</i> |
| streptomycin    | 4           | 4                  | 4                             |
| erythromycin    | 8           | 8                  | 8                             |
| isoniazid       | >32         | >32                | >32                           |
| rifampicin      | 0.04        | 0.04               | 0.04                          |
| polymyxin B     | >1600       | >1600              | >1600                         |
| chloramphenicol | <16         | <16                | 256*                          |

\*The vector used to complement the *mptC* mutant contains a chloramphenicol resistance cassette.

# 1 Supplementary Figures & Figure legends

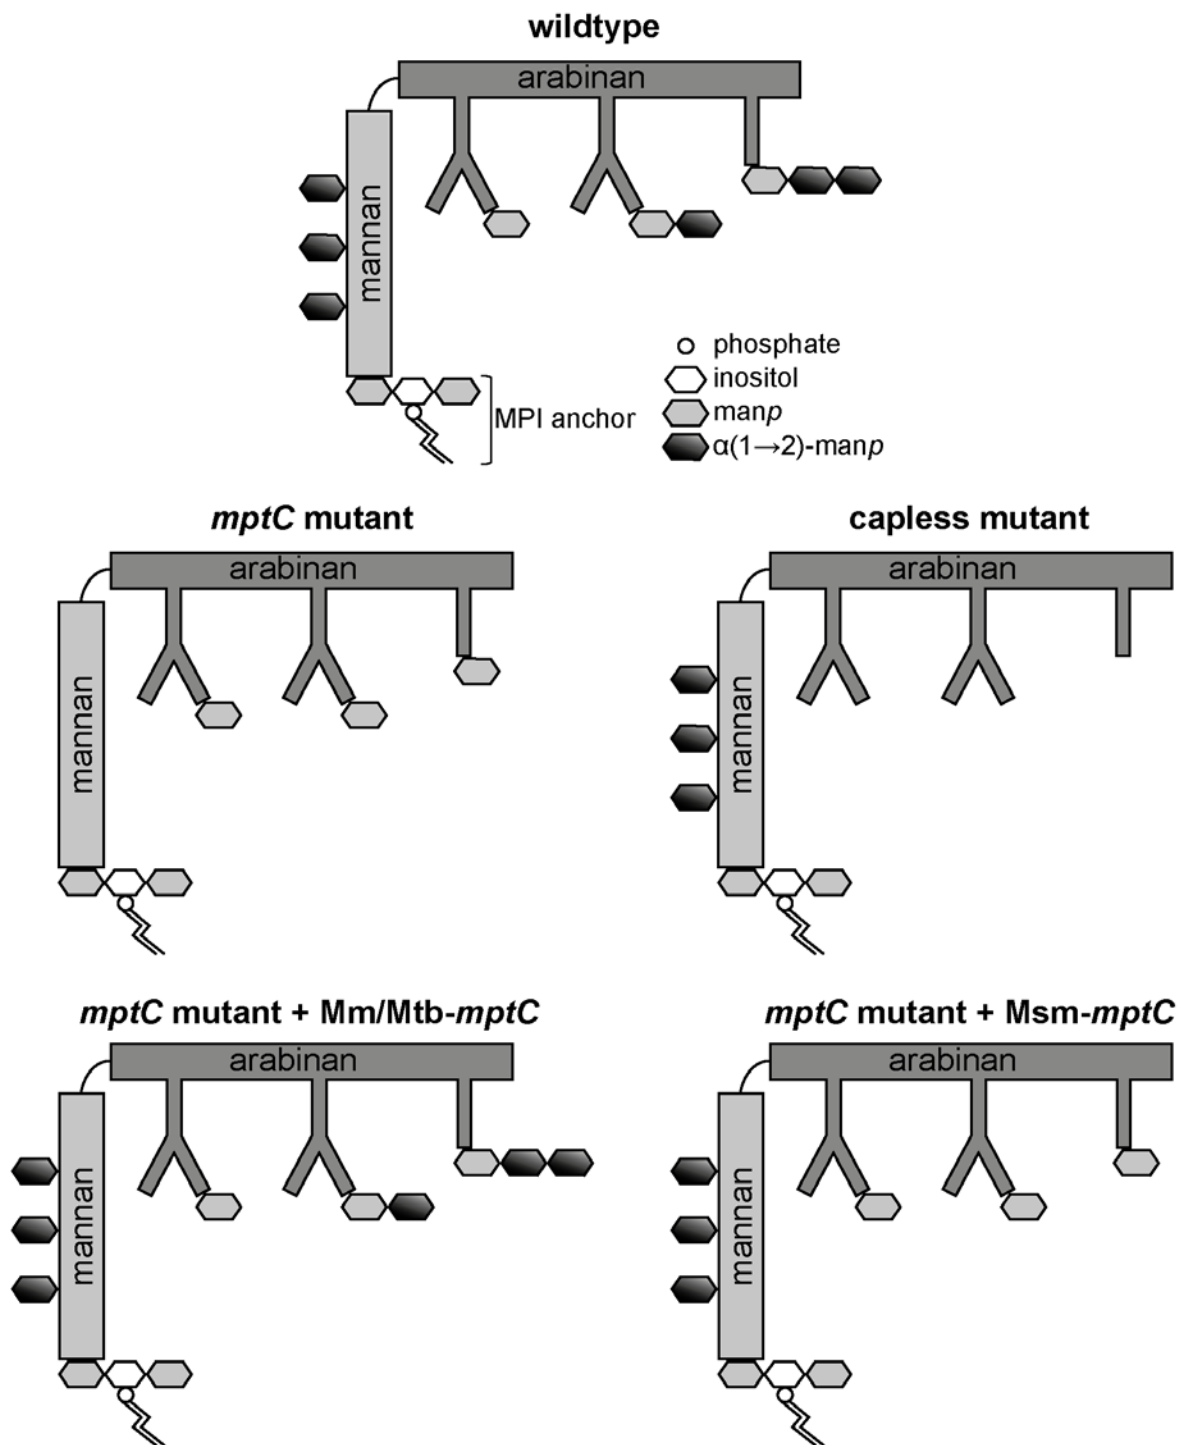

2

3 **Figure S1. Schematic structure of lipoarabinomannan (LAM) of the different strains**  
 4 **used in this study.** Schematic representations of LAM of wildtype *M. marinum*, the *mptC*  
 5 mutant, the capless mutant, the *mptC* mutant complemented with the *M. marinum* or *M.*  
 6 *tuberculosis mptC* (*mptC* mutant + Mm/Mtb-*mptC*), or the *mptC* mutant complemented with

1 the *M. smegmatis* mptC (*mptC* mutant + Msm-*mptC*). ManLAM is anchored into the  
2 mycobacterial cell envelope by its mannosylphosphatidyl-*myo*-inositol (MPI) moiety. The MPI  
3 anchor is linked to a mannan core consisting of  $\alpha(1\rightarrow6)$ -linked mannopyranose (*manp*)  
4 residues branched with  $\alpha(1\rightarrow2)$ -linked *manp* units. The structure is further glycosylated with  
5 an arabinan domain consisting of a linear  $\alpha(1\rightarrow5)$ -linked arabinofuranosyl (*araf*) polymer  
6 branched with linear or bifurcating *araf* side chains. The non-reducing termini of the arabinan  
7 domain can be substituted with one to three *manp* residues; the mannose caps. The first  
8 *manp* unit is  $\alpha(1\rightarrow5)$ -linked and the following *manp* residues are  $\alpha(1\rightarrow2)$ -linked.

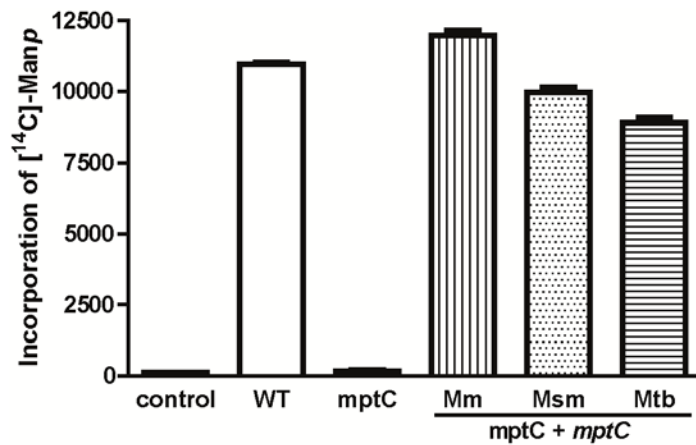

**Figure S2.  $\alpha(1\rightarrow2)$ -Mannosyltransferase activity of *mptC* mutant and related strains.** *In vitro*  $\alpha(1\rightarrow2)$ -mannosyltransferase assay with synthetic nonasaccharide acceptor and membrane fractions from the blank (control), wildtype *M. marinum* (WT), *mptC* mutant (*mptC*), *mptC* mutant complemented with *mmar\_3225* (*mptC* + *mptC* Mm), *mptC* mutant complemented with *msmeg4247* (*mptC* + *mptC* Msm) and *mptC* mutant complemented with *Rv2181* (*mptC* + *mptC* Mtb). The results represent mean + SEM of three independent experiments.

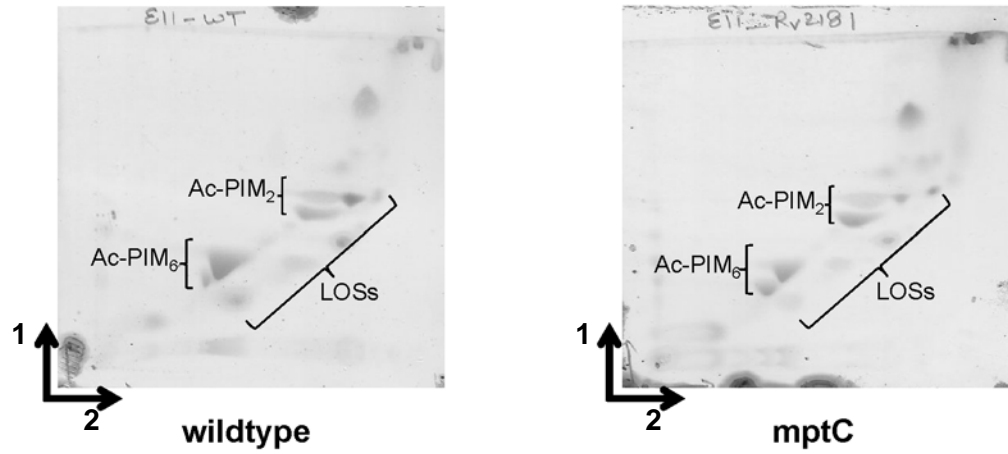

**Figure S3. Analysis of PIM biosynthesis in wildtype *M. marinum* (wildtype) and the *mptC* mutant (*mptC*).** The polar lipids were extracted and examined by 2D-TLC. First and second dimensions are indicated by arrows and numbers.

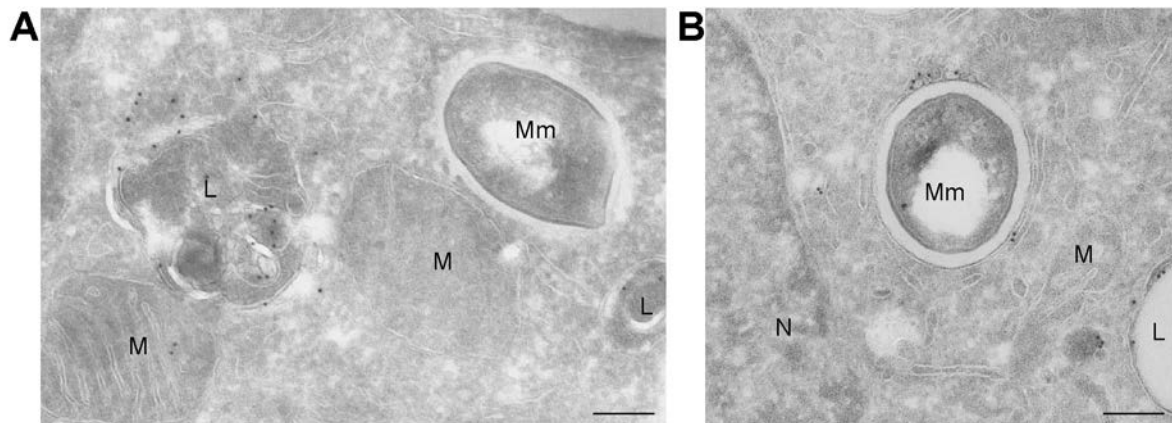

**Figure S4. EM images of sections of THP-1 cells infected for 24 hours with the *M. marinum mptC* mutant.** Representative images of sections of cells with (A) cytosolic and (B) phagosomal *mptC* mutant bacterium (Mm), and immunogold labeled for CD63 with 10 nm gold particles, indicating the presence of phagosomal membranes. L= lysosome, M= mitochondria, N= nucleus and the bars represent 200 nm.
